# Supplementary material for: Factors Associated with Unplanned Primary Cesarean Birth: Secondary Analysis of the Listening to Mothers in California Survey
Source: Springer Nature journal article supplement (doi:10.1186/s12884-020-03095-4), 2020-08-14
Supplement: MOESM1 [file 18283942]

# ***Listening to Mothers in California***

## Survey Questionnaire

Visit [NationalPartnership.org/LTMCA](https://NationalPartnership.org/LTMCA) and [chcf.org/listening-to-mothers-CA](https://chcf.org/listening-to-mothers-CA) for the full *Listening to Mothers in California* report, more on the methodology and many related resources.

*The Listening to Mothers in California survey was led by the National Partnership for Women & Families and developed in collaboration with investigators from the University of California, San Francisco Center on Social Disparities in Health and the Boston University School of Public Health. Quantum Market Research, Inc. administered the survey. The California Health Care Foundation and Yellow Chair Foundation funded this work.*

 This work is licensed under a Creative Commons Attribution-NonCommercial NoDerivatives 4.0 International License.

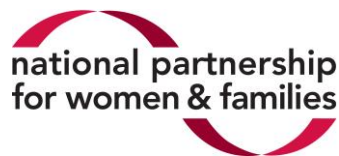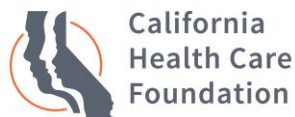

YELLOW CHAIR FOUNDATION

---

**SUBJECTS FOR QUESTIONNAIRE**

|               |                                              |
|---------------|----------------------------------------------|
| SECTION 600:  | PARITY                                       |
| SECTION 700:  | CHOICE OF MATERNITY CARE PROVIDER & HOSPITAL |
| SECTION 800:  | PRENATAL CARE                                |
| SECTION 900:  | PRENATAL MENTAL HEALTH                       |
| SECTION 1100: | INTRAPARTUM                                  |
| SECTION 1200: | MODE OF BIRTH                                |
| SECTION 1300: | EXPERIENCES AND VIEWS OF GIVING BIRTH        |
| SECTION 1400: | POSTPARTUM                                   |
| SECTION 1500: | BREASTFEEDING                                |
| SECTION 1600: | EMPLOYMENT                                   |
| SECTION 1700: | WOMEN'S ATTITUDES, BELIEFS, & PREFERENCES    |
| SECTION 1000: | BIOMETRICS, INSURANCE AND DEMOGRAPHICS       |

Note: the following final response choice was offered for all items: *Prefer not to answer / Prefiero no contestar*

---

**BASE: ALL RESPONDENTS**

What was the date of your baby's birth? / ¿Cuál fue la fecha del nacimiento de su bebé?

**Q510a**

[RANGE: 09-12]

Month / mes |\_|\_|

**Q510b**

[RANGE: 1-31]

Day / día |\_|\_|

**Q510c**

2016 / 2016

**BASE: ALL RESPONDENTS**

**Q520** Congratulations on the birth of your baby. Did you have a boy or a girl? / Felicitaciones por el nacimiento de su bebé. ¿Tuvo un niño o una niña?

- 1 Boy / Niño
- 2 Girl / Niña

**SECTION 600: PARITY**

**BASE: ALL RESPONDENTS**

**Q610** *This survey asks about your experiences with your baby who was born [birth date]. We will call this your "recent" pregnancy and birth. In all, how many babies have you had? Please include your new baby. / Esta encuesta pregunta sobre sus experiencias con su bebé que nació [birth date]. Vamos a llamar a esto su "reciente" embarazo y parto. En total, ¿cuántos bebés ha tenido usted? Por favor incluya a su nuevo bebé.*

[RANGE: 1-20]

|\_|\_| babies / bebés

**SECTION 700: CHOICE OF MATERNITY CARE PROVIDER & HOSPITAL**

**BASE: ALL RESPONDENTS**

**Q705** *By "maternity care provider" we mean a doctor, midwife, or nurse practitioner who provided your health care for pregnancy and the baby's birth. Did you have a choice about which maternity care provider you had for your pregnancy care (prenatal care)? / Por "proveedor de cuidado de maternidad" queremos decir un doctor, partera o enfermera calificada para ejercer medicina, que le proporcionó cuidado de salud para su embarazo y el nacimiento de su bebé. ¿Tuvo usted la oportunidad de elegir qué proveedor de cuidado de maternidad tener para su cuidado de embarazo (cuidado prenatal)?*

- 1 Yes, I had a choice / Sí, pude elegir
- 2 No, I had no choice; my maternity care provider was assigned to me / No, no pude elegir; mi proveedor de cuidado de maternidad me fue asignado
- 3 I did not get **any** prenatal care from a maternity care provider / No tuve **ningún** cuidado prenatal de un proveedor de cuidado de maternidad

**BASE: ALL RESPONDENTS**

**Q715** During your recent pregnancy, did you **find any information** to help you compare the **quality of different maternity care services** in your area? / Durante su reciente embarazo, ¿**encontró alguna información** que le ayudase a comparar **la calidad de los diferentes servicios de cuidado de maternidad** en su área?

- 1 Yes, about different maternity care providers / Sí, acerca de diferentes proveedores de cuidado de maternidad
- 2 Yes, about different hospitals for giving birth / Sí, acerca de diferentes hospitales para dar a luz
- 3 Yes, about both maternity care providers **and** hospitals / Sí, acerca de ambos, proveedores de cuidado de maternidad y hospitales
- 4 No / No
- 5 Not sure / No estoy segura

**BASE: FOUND COMPARATIVE QUALITY INFORMATION ABOUT MATERNITY CARE SERVICES (Q715 = 1, 2, or 3)**

**Q716** During your recent pregnancy, did you **use the information** you found to **help choose among different maternity services**? / Durante su reciente embarazo, ¿**usó la información** que encontró para **ayudarle a escoger entre servicios de maternidad**?

*If Q715 = 1 or 2:*

- 1 Yes / Sí
- 5 No / No
- 6 Not sure / No estoy segura

*If Q715 = 3:*

- 2 Yes, to choose a maternity care provider / Sí, para escoger un proveedor de cuidado de maternidad
- 3 Yes, to choose a hospital / Sí, para escoger un hospital
- 4 Yes, to choose both a maternity care provider and a hospital / Sí, para escoger ambos, un proveedor de cuidado de maternidad y un hospital
- 5 No / No
- 6 Not sure / No estoy segura

**BASE: ALL RESPONDENTS**

**Q740** During your pregnancy, did you try to learn how often babies were delivered by c-section (cesarean) at any hospitals where you might have your baby? / Durante su embarazo, ¿trató de averiguar con qué frecuencia los bebés fueron dados a luz por cesárea, en cualquiera de los hospitales donde usted podría tener a su bebé?

- 1 Yes, I looked and found this information / Sí, busqué y encontré esta información
- 2 Yes, I looked but did not find this information / Sí, busqué pero no encontré esta información
- 3 No, I did not look / No, no la busqué

**SECTION 800: PRENATAL CARE**

**BASE: ALL RESPONDENTS**

**Q805** Which type of maternity care provider **most often** provided your care during pregnancy? / ¿Qué tipo de proveedor de cuidado de maternidad le atendió **más a menudo** durante su embarazo?

- 1 An obstetrician-gynecologist doctor (could be called OB or ob-gyn) / Un médico obstetra-ginecólogo (puede ser llamado OB)
- 2 A family medicine doctor / Un médico de medicina familiar
- 3 A doctor but I'm not sure what type / Un médico, pero no estoy segura de qué tipo
- 4 A midwife (could be called CNM) / Una partera (puede ser llamada CNM)
- 5 A nurse practitioner (NP) or other nurse who is **not** a midwife / Una enfermera calificada para ejercer medicina ("nurse practitioner" o NP) u otra enfermera que **no es** una partera
- 6 A physician assistant (PA) / Un asistente médico certificado ("physician assistant" o PA)

**BASE: MOST OFTEN HAD OB-GYN FOR PRENATAL CARE (Q805 = 1)**

**Q806** How important was it to you to have an ob-gyn doctor rather than a different type of maternity care provider? / ¿Cuán importante fue para usted tener un médico obstetra-ginecólogo en lugar de un tipo de proveedor diferente de cuidado de maternidad?

- 1 Extremely important / Extremadamente importante
- 2 Very important / Muy importante
- 3 Moderately important / Moderadamente importante
- 4 Slightly important / Poco importante
- 5 Not at all important / Nada importante

**BASE: MOST OFTEN HAD FAMILY PHYSICIAN FOR PRENATAL CARE (Q805 = 2)**

**Q807** How important was it to you to have a family medicine doctor rather than a different type of maternity care provider? / ¿Cuán importante fue para usted tener un médico de medicina familiar, en lugar de un tipo de proveedor diferente de cuidado de maternidad?

- 1 Extremely important / Extremadamente importante
- 2 Very important / Muy importante
- 3 Moderately important / Moderadamente importante
- 4 Slightly important / Poco importante
- 5 Not at all important / Nada importante

**BASE: MOST OFTEN HAD MIDWIFE FOR PRENATAL CARE (Q805 = 4)**

**Q808** How important was it to you to have a midwife rather than a different type of maternity care provider? / ¿Cuán importante fue para usted tener una partera, en lugar de un tipo de proveedor diferente de cuidado de maternidad?

- 1 Extremely important / Extremadamente importante
- 2 Very important / Muy importante
- 3 Moderately important / Moderadamente importante
- 4 Slightly important / Poco importante
- 5 Not at all important / Nada importante

**BASE: MOST OFTEN HAD NURSE-PRACTITIONER FOR PRENATAL CARE (Q805 = 5)**

**Q809** How important was it to you to have a nurse-practitioner rather than a different type of maternity care provider? / ¿Cuán importante fue para usted tener una enfermera calificada para ejercer medicina (“nurse practitioner”) en lugar de un tipo de proveedor diferente de cuidado de maternidad?

- 1 Extremely important / Extremadamente importante
- 2 Very important / Muy importante
- 3 Moderately important / Moderadamente importante
- 4 Slightly important / Poco importante
- 5 Not at all important / Nada importante

**BASE: MOST OFTEN HAD PHYSICIAN ASSISTANT FOR PRENATAL CARE (Q805 = 6)**

**Q810** How important was it to you to have a physician assistant rather than a different type of maternity care provider? / ¿Cuán importante fue para usted tener un asistente medico certificado (“physician assistant”) en lugar de un tipo de proveedor diferente de cuidado de maternidad?

- 1 Extremely important / Extremadamente importante
- 2 Very important / Muy importante
- 3 Moderately important / Moderadamente importante
- 4 Slightly important / Poco importante
- 5 Not at all important / Nada importante

**BASE: ALL RESPONDENTS**

**Q811** Would you have preferred a different type of maternity care provider? / ¿Hubiera preferido tener un tipo de proveedor de cuidado de maternidad diferente?

- 1 Yes / Sí
- 2 No / No

**BASE: WOULD HAVE PREFERRED A DIFFERENT TYPE OF PROVIDER (Q811 = 1)**

**Q815** Which type of provider do you wish you had? / ¿Qué tipo de proveedor desearía haber tenido?

- 1 Obstetrician-gynecologist doctor (OB or ob-gyn) / Médico obstetra-ginecólogo (OB u ob-gin)
- 2 Family medicine doctor / Médico de medicina familiar
- 3 Midwife (CNM) / Partera (CNM)
- 4 Nurse-practitioner (NP) or other nurse who is **not** a midwife / Enfermera calificada para ejercer medicina (“nurse practitioner” o NP) u otra enfermera que **no** es una partera
- 5 Physician assistant / Asistente médico certificado (“physician assistant” o PA)
- 6 Other / Otro

**BASE: WOULD HAVE PREFERRED BUT DID NOT HAVE A MIDWIFE (Q815 = 3)**

Why didn't you have a midwife as your prenatal maternity care provider? **Please choose all that apply.** / ¿Por qué no tuvo a una partera como su proveedor de cuidado de maternidad? **Por favor escoja todo lo aplicable.**

**Q816a** I didn't think that my health insurance plan paid for services of a midwife / No pensé que mi plan de seguro médico pagaba por servicios de partera

**Q816b** I didn't think that a midwife could practice in a hospital / No pensé que una partera pudiera practicar en un hospital

**Q816c** I didn't think that I could have an epidural with a midwife / No pensé que podría tener una anestesia epidural con una partera

**Q816d** I didn't know what would happen if I needed a doctor (for example, for a c-section) / No sabía qué pasaría si necesitaba un médico (por ejemplo, para una cesárea)

**Q816e** Another type of maternity care provider was assigned to me / Me asignaron otro tipo de proveedor de cuidado de maternidad

**Q816f** A midwife was not available / No estaba disponible una partera

**Q816g** I needed a doctor because of health problems / Necesitaba un médico porque tenía problemas de salud

**Q816h** Other reason why you didn't have a midwife as your maternity care provider, please tell us: / Otra razón por la que no tuvo una partera como su proveedor de cuidado de maternidad, por favor díganos:

*Write-in = Q816\_TEXT*

*For each:*

1 *Checked this box*

2 *Did not check this box*

**BASE: ALL RESPONDENTS**

**Q850** *In pregnancy, an "ultrasound" (or "sonogram") is a way to view a baby growing in a woman's womb. / En el embarazo, un "ultrasonido" (o "sonograma") es una manera de ver a un bebé crecer en el útero de una mujer.*

Near the end of pregnancy, did a health professional use an ultrasound to estimate how much your baby weighed? / Cerca del final del embarazo, ¿un profesional de la salud usó el ultrasonido para estimar cuánto pesaba su bebé?

1 Yes / Sí

2 No / No

3 Not sure / No estoy segura

**BASE: ALL RESPONDENTS**

**Q855** Near the end of your pregnancy, did your maternity care provider tell you that your baby might be getting quite large? / Cerca del final del embarazo, ¿su proveedor de cuidado de maternidad le dijo que su bebé podría estar poniéndose bastante grande?

1 Yes / Sí

2 No / No

**BASE: ALL RESPONDENTS**

*A "due date" is a maternity care provider's estimate of when your baby will be born. What was your baby's final due date? If you are not sure, give your best guess. Please fill in the 3 boxes. / La "fecha prevista de parto" es la fecha en que el proveedor de cuidado de maternidad estima que va a nacer su bebé. ¿Cuál fue su fecha final prevista de parto? Si no está segura, dé su mejor estimado. Por favor complete los 3 casilleros.*

**Q865\_month**  
Month / Mes |\_\_|

**Q865\_day**  
Day / Día |\_\_|

**Q865\_year**  
Year / Año |\_2\_|\_0\_|\_1\_|

**BASE: ALL RESPONDENTS**

**Q870** *The next questions are about planning for your baby's birth. As you came to the end of your pregnancy, how did you want to feed your baby? / Las siguientes preguntas son acerca del planeamiento del nacimiento de su bebé. Al acercarse el final de su embarazo, ¿cómo quería alimentar a su bebé?*

- 1 Breast milk only / Con leche materna solamente
- 2 Formula only / Con fórmula solamente
- 3 Both breast milk and formula / Con ambas, leche materna y fórmula

**BASE: ALL RESPONDENTS**

**Q885** During your pregnancy, did **you** ask your maternity care provider to schedule a c-section before the start of labor (before regular contractions)? / Durante su embarazo, ¿le pidió **usted** a su proveedor de cuidado de maternidad programar una cesárea antes del comienzo del trabajo de parto (antes de las contracciones regulares)?

- 1 Yes / Sí
- 2 No / No

**BASE: ASKED FOR A PLANNED CESAREAN (Q885 = 1)**

**Q890** Who first suggested the idea of having a planned c-section? / ¿Quién fue el primero en sugerirle la idea de una cesárea planificada?

- 1 My maternity care provider / Mi proveedor de cuidado de maternidad
- 2 I did / Yo lo hice
- 3 Someone else / Alguien más

**BASE: ASKED FOR PLANNED CESAREAN (Q885 = 1)**

**Q895** When you asked to schedule a c-section, did you think that it would be best for your health or your baby's health, or was it for some other reason? / Cuando usted pidió programar una cesárea, ¿pensó que iba a ser lo mejor para su salud y la salud de su bebé, o fue por alguna otra razón?

- 1 Best for my health or my baby's health / Lo mejor para mi salud o para la salud de mi bebé
- 2 I wanted it for some other reason. Please tell us: / Lo quise por alguna otra razón. Por favor díganos:  
*Write-in = Q895\_TEXT*

|                                            |
|--------------------------------------------|
| <b>SECTION 900: PRENATAL MENTAL HEALTH</b> |
|--------------------------------------------|

**BASE: ALL RESPONDENTS**

**Q925a** During your recent pregnancy, how often were you bothered by feeling nervous, anxious, or on edge? / ¿Durante su reciente embarazo, qué tan seguido estuvo molesta por sentirse nerviosa, ansiosa o tensa?

- 1 Never / Nunca
- 2 Sometimes / Algunas veces
- 3 Usually / Usualmente
- 4 Always / Siempre



**BASE: ALL RESPONDENTS**

**Q925b** During your recent pregnancy, how often were you bothered by not being able to stop or control worrying? / ¿Durante su reciente embarazo, qué tan seguido estuvo molesta por no poder parar o controlar su preocupación?

- 1 Never / Nunca
- 2 Sometimes / Algunas veces
- 3 Usually / Usualmente
- 4 Always / Siempre

**BASE: ALL RESPONDENTS**

**Q925c** During your recent pregnancy, how often were you bothered by feeling down, depressed, or hopeless? / ¿Durante su reciente embarazo, qué tan seguido estuvo molesta por sentirse decaída, deprimida o desesperanzada?

- 1 Never / Nunca
- 2 Sometimes / Algunas veces
- 3 Usually / Usualmente
- 4 Always / Siempre

**BASE: ALL RESPONDENTS**

**Q925d** During your recent pregnancy, how often were you bothered by having little interest or pleasure in doing things? / ¿Durante su reciente embarazo, qué tan seguido estuvo molesta por tener poco interés o placer en hacer cosas?

- 1 Never / Nunca
- 2 Sometimes / Algunas veces
- 3 Usually / Usualmente
- 4 Always / Siempre

**SECTION 1100: INTRAPARTUM**

**BASE: ALL RESPONDENTS**

**Q1105** *The following questions are about your experiences around the time of birth. A “doula” is a trained labor companion who gives comfort, emotional support, and information during birth. A doula **does not** provide medical care. Did you get support from a doula during your recent birth? / Las siguientes preguntas son acerca de sus experiencias alrededor del tiempo del alumbramiento. Una **doula** es una compañera de parto entrenada que da comodidad, apoyo emocional e información durante del nacimiento. Una doula **no** proporciona cuidado médico. ¿Tuvo apoyo de una doula durante su reciente embarazo o durante o después del parto?*

- 1 Yes / Sí
- 2 No / No
- 3 Not sure / No estoy segura

**BASE: GOT SUPPORT FROM A DOULA WHILE GIVING BIRTH (Q1105 = 1)**

**Q1106a** Did you also get support from your doula during pregnancy (before you went into the hospital)? / ¿También tuvo apoyo de su doula durante el embarazo (antes de que fuera usted al hospital)?

- 1 Yes / Sí
- 2 No / No

**BASE: GOT SUPPORT FROM A DOULA WHILE GIVING BIRTH (Q1105 = 1)**

**Q1106b** Did you also get support from your doula after the birth when you were at home? / ¿También tuvo apoyo de su doula después del nacimiento, cuando usted estaba en casa?

- 1 Yes / Sí
- 2 No / No

**BASE: ALL RESPONDENTS**

**Q1110** By “inducing labor,” we mean using medicine or some other method to try to start the regular contractions of childbirth – before they start on their own. Did your maternity care provider try to induce your labor in any way? / Por “inducir el parto”, queremos decir usar medicina o algún otro método para tratar de empezar las contracciones regulares, antes de que empiecen por sí mismas. ¿Su proveedor de cuidado de maternidad trató de inducir su parto de alguna forma?

- 1 Yes / Sí
- 2 No / No

**BASE: CARE PROVIDER TRIED TO INDUCE LABOR (Q1110 = 1)**

How did your maternity care provider try to start your labor? **Please select all that apply.** / ¿Cómo trató de empezar el parto su proveedor de cuidado de maternidad? **Por favor seleccione todo lo aplicable.**

**Q1111a** Inserted a finger into the opening to my womb (cervix) to “sweep” or “strip” the membranes loose / Metió un dedo en la abertura de mi útero (cérvix - cuello del útero) para “barrer” o “aflojar” las membranas

**Q1111b** Broke and released my water **before the start of labor contractions** / Rompió y soltó mi agua **antes de que empezaran las contracciones del parto**

**Q1111c** Gave the medicine Pitocin (“pit” or oxytocin) through an IV drip **before the start of labor contractions** / Me dio la medicina Pitocina (“pit” o oxitocina) a través de goteo intravenoso **antes de que empezaran las contracciones del parto**

**Q1111d** Tried to start my labor some other way. Please tell us: / Trató de empezar mi parto de alguna otra manera.  
Por favor díganos:  
*Write-in = Q1111\_TEXT*

**Q1111e** Not sure how / No estoy segura cómo

*For each:*

- 1 *Checked this box*
- 2 *Did not check this box*

**BASE: CARE PROVIDER TRIED TO INDUCE LABOR (Q1110 = 1)**

**Q1112** Did the medicine or other method used by your maternity care provider actually start your labor? / ¿La medicina u otro método usado por su proveedor de cuidado de maternidad, realmente empezó su parto?

- 1 Yes / Sí
- 2 No / No
- 3 Not sure / No estoy segura

**BASE: CARE PROVIDER TRIED TO INDUCE LABOR (Q1110 = 1)**

Why did your maternity care provider try to start your labor? **Please select all that apply.** / ¿Por qué su proveedor de cuidado de maternidad trató de empezar el parto? **Por favor seleccione todo lo aplicable.**

**Q1113a** My baby was getting too big / Mi bebé estaba poniéndose muy grande

**Q1113b** They were worried that I was “overdue” / Ellos estaban preocupados de que ya me había “pasado de mi fecha”

**Q1113c** My water had broken and they worried about infection / Mi bolsa de agua se había roto y ellos estaban preocupados acerca de una infección

**Q1113d** The baby needed to be born soon due to a health problem (for one or both of us) / El bebé necesitaba nacer pronto debido a un problema de salud (para uno o para ambos de nosotros)

**Q1113e** I wanted to control the timing for work or other non-medical reasons / Quise controlar el tiempo por razones de trabajo u otras razones no médicas

**Q1113f** I wanted to give birth with a specific provider / Quería dar a luz con un proveedor específico

**Q1113g** Baby was full term: it was close to my due date / El bebé estaba a término completo: estaba cerca de mi fecha prevista de parto

**Q1113h** Some other reason. Please tell us: / Alguna otra razón. Por favor díganos:

*Write-in = Q1113\_TEXT*

**Q1113i** Not sure / No estoy segura

**Q1113j** [Write-in provided a new non-evidence-based reason for induction (recode).] / [Recode based on English translation of Spanish responses.]

*For each:*

1 *Checked this box*

2 *Did not check this box*

**BASE: ALL RESPONDENTS**

**Q1115** When you recently gave birth, was your baby born vaginally or by c-section? / ¿Cuándo dio a luz recientemente, su bebé nació vaginalmente o por cesárea?

1 Vaginally / Vaginalmente (natural)

2 By c-section (surgery) / Por cesárea (cirugía)

**BASE: MOST RECENT BIRTH CESAREAN (Q1115 = 2)**

**Q1120** Before your c-section, did you experience some period of time **in labor (having regular contractions)** in the hospital and try to have a vaginal birth? / ¿Antes de su cesárea, experimentó algún período de tiempo **en trabajo de parto (teniendo contracciones regulares)** en el hospital y trató de tener un parto vaginal?

1 Yes / Sí

2 No / No

**BASE: EXPERIENCED LABOR (Q1115 = 1 OR Q1120 = 1)**

**Q1125** During labor, did the doctors, nurses or midwives use any of the following to keep track of your baby's heartbeat? / ¿Durante el trabajo de parto, los médicos, enfermeras o parteras usaron cualquiera de lo siguiente para el seguimiento del latido del corazón de su bebé?

- 1 An electronic fetal monitor ("EFM") with sensors on your belly or your baby's head / Un monitor electrónico fetal ("EFM") con sensores en su vientre o en la cabeza de su bebé
- 2 A handheld device like a "Doppler" or stethoscope to listen inside your womb / Un aparato portátil como un "Doppler" o un estetoscopio para escuchar dentro de su vientre
- 3 Both an EFM and a hand-held device / Ambos, un EFM y un aparato portátil
- 4 Neither an EFM nor a hand-held device / Ninguno, ni un EFM o ni un aparato portátil
- 5 Not sure / No estoy segura

**BASE: EXPERIENCED LABOR (Q1115 = 1 OR Q1120 = 1)**

**Q1130a** During your labor, did someone break your bag of water after labor contractions had begun? / Durante su trabajo de parto, ¿alguien rompió su bolsa de agua después de que las contracciones del parto habían empezado?

- 1 Yes / Sí
- 2 No / No
- 3 Not sure / No estoy segura

**BASE: EXPERIENCED LABOR (Q1115 = 1 OR Q1120 = 1)**

**Q1130b** During your labor, did someone give you the drug Pitocin ("pit" or oxytocin) to speed up labor after labor contractions had begun? / Durante su trabajo de parto, ¿alguien le dio la droga Pitocina ("pit" u oxitocina) para apurar el parto, luego de que las contracciones del trabajo de parto empezaron?

- 1 Yes / Sí
- 2 No / No
- 3 Not sure / No estoy segura

**BASE: EXPERIENCED LABOR (Q1115 = 1 OR Q1120 = 1)**

**Q1130c** During your labor, did someone insert a tube (catheter) in your bladder to remove urine? / Durante su trabajo de parto, ¿alguien le insertó un tubo (catéter) en su vejiga para remover la orina?

- 1 Yes / Sí
- 2 No / No
- 3 Not sure / No estoy segura

**BASE: EXPERIENCED LABOR (Q1115 = 1 OR Q1120 = 1)**

**Q1130d** During your labor, did someone give you IV fluids through a vein in your arm or hand? / Durante su trabajo de parto, ¿alguien le dio líquidos intravenosos a través de una vena de su brazo o su mano?

- 1 Yes / Sí
- 2 No / No
- 3 Not sure / No estoy segura

**BASE: EXPERIENCED LABOR (Q1115 = 1 OR Q1120 = 1)**

**Q1130e** During your labor, did someone give you one or more vaginal exams? / Durante su trabajo de parto, ¿alguien le dio uno o más exámenes vaginales?

- 1 Yes / Sí
- 2 No / No
- 3 Not sure / No estoy segura

**BASE: EXPERIENCED LABOR (Q1115 = 1 OR Q1120 = 1)**

**Q1130f** During your labor, did someone give you an episiotomy (cut just before birth to make the opening to your vagina bigger)? / Durante su trabajo de parto, ¿alguien le dio una episiotomía (un corte justo antes del nacimiento para hacer más grande la abertura de su vagina)?

- 1 Yes / Sí
- 2 No / No
- 3 Not sure / No estoy segura

**BASE: HAD EPISIOTOMY (Q1130f =1)**

**Q1132** Did you have a choice about whether to have an episiotomy? / ¿Tuvo la opción de elegir entre tener o no la episiotomía?

- 1 Yes / Sí
- 2 No / No
- 3 Not sure / No estoy segura

**BASE: HAD ONE OR MORE VAGINAL EXAMS DURING LABOR AND BIRTH (Q1130e = 1)**

**Q1133** When you were admitted to the hospital and had your **first vaginal exam**, how many centimeters was your cervix dilated (opened)? / Cuando usted fue admitida al hospital y tuvo su **primer examen vaginal**, ¿cuántos centímetros estaba dilatado (abierto) su cuello uterino (cérvix)?

[RANGE 0-10]

|| centimeters / centímetros OR / O 99 Not sure/No estoy segura

**BASE: EXPERIENCED LABOR (Q1115 = 1 OR Q1120 = 1)**

**Q1135** After you were admitted to the hospital and you were in labor (having regular contractions), did you walk around at all before giving birth? / Después de que fuera admitida al hospital y estaba en trabajo de parto (teniendo contracciones regulares), ¿caminó algo, alrededor, antes de dar a luz?

- 1 Yes / Sí
- 2 No / No
- 3 Not sure / No estoy segura

**BASE: CESAREAN WITHOUT LABOR/PLANNED CESAREAN (Q1120 = 2)**

**Q1140a** Before your c-section, did someone give you IV fluids through a vein in your arm or hand? / Antes de su cesárea, ¿alguien le dio líquidos intravenosos a través de una vena de su brazo o su mano?

- 1 Yes / Sí
- 2 No / No
- 3 Not sure / No estoy segura

**BASE: CESAREAN WITHOUT LABOR/PLANNED CESAREAN (Q1120 = 2)**

**Q1140b** Before your c-section, did someone insert a tube (catheter) into your bladder to remove urine? / Antes de su cesárea, ¿alguien le insertó un tubo (catéter) dentro de su vejiga para remover la orina?

- 1 Yes / Sí
- 2 No / No
- 3 Not sure / No estoy segura

**BASE: ALL RESPONDENTS**

Did you use any of the following **medicines** for pain relief when you recently gave birth? **Please select all that apply.** ¿Usó alguna de las siguientes **medicinas** para aliviar el dolor, cuando recientemente dio a luz? **Por favor seleccione todo lo aplicable.**

- Q1145a** Epidural or spinal (medicine inserted into spinal column in your back) / Epidural o espinal (medicina insertada en su columna vertebral, en su espalda)
- Q1145b** Narcotics such as Demerol or Stadol (by a shot, spray in nose, or IV line in your arm) / Narcóticos como Demerol o Stadol (administrada por inyección, spray nasal o línea intravenosa en su brazo)
- Q1145c** Nitrous oxide gas (**not oxygen**) breathed through a mask or mouthpiece while you were awake / Gas de óxido nitroso (**no oxígeno**) respirado a través de una máscara o boquilla, mientras estuvo despierta
- Q1145d** General anesthesia (you were put to sleep) / Anestesia general (la pusieron a dormir)
- Q1145e** Other, please tell us: / Otro, por favor díganos:  
*Write-in = Q1145\_TEXT*
- Q1145f** I did not use any pain medicine during labor. / No usé ninguna medicina para el dolor durante el parto.  
*(Exclusive)*

*For each:*

- 1 *Checked this box*
- 2 *Did not check this box*

**BASE: EXPERIENCED LABOR (Q1115 = 1 OR Q1120 = 1)**

Did you use any of the following “**drug-free**” **methods** for pain relief during your recent labor and birth? **Please select all that apply.** ¿Usó alguno de los siguientes métodos “**libres de medicamentos**” para aliviar el dolor durante su reciente labor de parto y alumbramiento? **Por favor seleccione todo lo aplicable.**

- Q1147a** A shower, tub, or pool / Una ducha, tina o piscina
- Q1147b** Change of position or moving around / Cambio de posición o estando en actividad
- Q1147c** A large, inflated ball (round or peanut-shaped) for support / Una pelota grande, inflada (redonda o de forma de cacahuete) para apoyo
- Q1147d** Putting hot or cold objects on your body (such as a heating pad or ice pack) / Poniendo objetos calientes o fríos en su cuerpo (tales como compresa caliente o bolsa de hielo)
- Q1147e** A mental method like relaxation, visualization or hypnosis / Un método mental como relajación, visualización o hipnosis
- Q1147f** A hands-on method (such as massage, stroking or acupressure) / Un método práctico (como masaje, caricias, acupresión)
- Q1147g** A breathing method / Un método de respiración
- Q1147h** Some other method, please tell us: / Algún otro método, por favor díganos:  
*Write-in = Q1147\_TEXT*
- Q1147i** None / Ninguno *(Exclusive)*

*For each:*

- 1 *Checked this box*
- 2 *Did not check this box*

**BASE: MOST RECENT BIRTH VAGINAL (Q1115 = 1)**

**Q1150** What was the **main** position you used when you pushed your baby out? / ¿Cuál fue la posición **principal** que usó usted cuando pujó hacia afuera a su bebé?

- 1 Lying flat on my back (head and hips at same level) / Permaneciendo acostada sobre mi espalda (con mi cabeza y caderas al mismo nivel)
- 2 Propped up (half-sitting, head higher than hips) / Apoyada (sentada a medias, con la cabeza más alta que las caderas)
- 3 Some other position (such as kneeling, on side, on hands and knees) / Cualquier otra posición (como arrodillada, de lado, de manos y rodillas)

**BASE: EXPERIENCED LABOR (Q1115 = 1 OR Q1120 = 1)**

**Q1155** How long was your labor? That is, about how many hours was it from when you began to have regular contractions until your baby was born? If you are not sure, give your best guess. / ¿Cuánto duró su parto? Es decir, ¿alrededor de cuántas horas duró desde que comenzó a tener contracciones regulares hasta que su bebé nació? Si no está segura, dé su mejor estimado.

[RANGE: 0-168]

\_\_|\_\_| hours / horas

**BASE: ALL RESPONDENTS**

**Q1165** Which type of maternity care provider delivered your baby on [date]? / ¿Qué tipo de proveedor de cuidado de maternidad dio a luz a su bebé en [date]?

- 1 An obstetrician-gynecologist doctor (OB or ob/gyn) / Un médico obstetra - ginecólogo
- 2 A family medicine doctor / Un médico de medicina familiar
- 3 A doctor but I'm not sure what type / Un médico pero no estoy segura de qué tipo
- 4 A midwife (CNM) / Una partera (CNM)
- 5 A nurse practitioner (NP) or other nurse who is not a midwife / Una enfermera calificada para ejercer medicina general ("nurse practitioner" o NP) u otra enfermera que no es partera
- 6 A physician assistant (PA) / Un asistente médico certificado ("physician assistant" o PA)
- 7 Other, please tell us: / Otro, por favor díganos:  
*Write-in = Q1165\_TEXT*

**BASE: ALL RESPONDENTS**

How much did your baby weigh at birth? If you are not sure, give your best guess. **Please answer for pounds and ounces OR for grams.** / ¿Cuánto pesó su bebé al nacer? Si no está segura, dé su mejor estimado. **Por favor conteste en libras y onzas O en gramos.**

\_\_|\_\_| pounds / libras    \_\_|\_\_| ounces / onzas    OR / O    \_\_|\_\_|\_\_|\_\_| grams    **Q1170a=99** Not sure / No estoy segura  
**Q1170a**                      **Q1170b**                      **Q1170c**

**BASE: ALL RESPONDENTS**

**Q1176** During the first two hours after your baby was born, how long did you hold your baby “skin-to-skin” (your baby’s bare chest on your bare chest)? / Durante las dos primeras horas después de que su bebé nació, ¿cuánto tiempo cargó usted a su bebé “piel-a-piel” (pecho desnudo de su bebé contra el pecho desnudo de usted)?

- 1 Not at all skin-to-skin / En ningún momento piel-a-piel
- 2 Less than 30 minutes / Menos de 30 minutos
- 3 30 minutes to 1 hour / De 30 minutos a 1 hora
- 4 1 to 2 hours / 1 a 2 horas
- 5 Not sure / No estoy segura

**BASE: ALL RESPONDENTS**

**Q1181** At any time during the hospital stay for birth, was your baby put in an intensive care unit (may be called the “NICU”)? / En algún momento durante la estadía en el hospital por su parto, ¿fue puesto su bebé en una unidad de cuidados intensivos (algunas veces llamado “NICU”)?

- 1 Yes, for the entire time in the hospital / Sí, por la totalidad del tiempo en el hospital
- 2 Yes, for part of the time in the hospital / Sí, por parte del tiempo en el hospital
- 3 No / No
- 4 Not sure / No estoy segura

**BASE: ALL RESPONDENTS**

**Q1185** Overall, how much did the nurses and other staff at the hospital support breastfeeding? / En general, ¿cuánto apoyaron la lactancia materna las enfermeras y otro personal del hospital?

- 1 Strongly supported it / La apoyaron totalmente
- 2 Somewhat supported it / La apoyaron en cierto modo
- 3 Neither supported nor discouraged it / Ni la apoyaron ni la desalentaron
- 4 Somewhat discouraged it / La desalentaron en cierto modo
- 5 Strongly discouraged it / La desalentaron totalmente

**BASE: ALL RESPONDENTS**

**Q1186** A week after your baby was born, how were you feeding [him/her]? / Una semana después de que nació su bebé, ¿cómo estaba alimentando usted a [él/ella]?

- 1 Breast milk only / Leche materna solamente
- 2 Formula only / Fórmula solamente
- 3 Both breast milk and formula / Ambas, leche materna y fórmula

**BASE: ALL RESPONDENTS**

**Q1190** From going in to leaving, how many days were you in the hospital for your recent birth? / Desde que entró hasta que salió, ¿cuántos días estuvo usted en el hospital por su reciente parto?

[RANGE 0-30]  
|\_|\_| days / días



**BASE: ALL RESPONDENTS**

**Q1195** After your baby was born, how long did [he/she] stay in the hospital? / Después de que su bebé nació, ¿cuánto tiempo se quedó [él/ella] en el hospital?

[RANGE 0-150]  
□□□ days / días

**SECTION 1200: MODE OF BIRTH**

**BASE: HAS GIVEN BIRTH TWO OR MORE TIMES (Q610 = 2 OR MORE)**

You mentioned earlier that you have given birth [*number from Q610*] times. How did you give birth the [first, second, third, etc. up to total number of *previous* births] time? / Usted mencionó antes que había dado a luz [*number from Q610*] veces. ¿Cómo dio a luz la [first, second, third, etc. up to total number of *previous* births] vez?

**Q1210a** First birth / Primer parto

**Q1210b** Second birth / Segundo parto

**Q1210c** Third birth / Tercer parto

**Q1210d** Fourth birth / Cuarto parto

**Q1210e** Fifth birth / Quinto parto

**Q1210f** Sixth birth / Sexto parto

**Q1210g** Seventh birth / Séptimo parto

**Q1210h** Eighth birth / Octavo parto

**Q1210i** Ninth birth / Noveno parto [note: no survey participant reported more than 9 previous, 10 births in all]

For each:

- 1 Vaginally / Vaginalmente
- 2 By c-section / Por cesárea

**BASE: ONE OR TWO PREVIOUS CESAREAN BIRTHS (1210a-o = 2 either 1 or 2 times)**

**Q1215** During your recent pregnancy, did you ever talk with your maternity care provider about scheduling another c-section because of your past c-section(s)? / Durante su reciente embarazo, ¿habló alguna vez con su proveedor de cuidado de maternidad sobre programar otra cesárea debido a su(s) pasada(s) cesárea(s)?

- 1 Yes / Sí
- 2 No / No

**BASE: TALKED WITH PROVIDER ABOUT SCHEDULING REPEAT CESAREAN BECAUSE OF PAST CESAREAN(S) (Q1215 = 1)**

**Q1220** How much did you and your maternity care provider talk about the reasons you might **want** to schedule another c-section? / ¿Cuánto tiempo hablaron usted y su proveedor de cuidado de maternidad sobre las razones por las cuales usted podría **querer** programar otra cesárea?

- 1 Not at all / Nada
- 2 A little / Poco
- 3 Some / Algo
- 4 A lot / Bastante

**BASE: TALKED WITH PROVIDER ABOUT SCHEDULING REPEAT CESAREAN BECAUSE OF PAST CESAREAN(S) (Q1215 = 1)**

**Q1225** How much did you and your maternity care provider talk about why you might **not want** to schedule another c-section? / ¿Cuánto tiempo hablaron usted y su proveedor de cuidado de maternidad sobre las razones por las que usted podría **no querer** programar otra cesárea?

- 1 Not at all / Nada
- 2 A little / Poco
- 3 Some / Algo
- 4 A lot / Bastante

**BASE: TALKED WITH PROVIDER ABOUT SCHEDULING REPEAT CESAREAN BECAUSE OF PAST CESAREAN(S) (Q1215 = 1)**

**Q1230** Did your maternity care provider explain that there were choices in how to give birth after a past c-section? / ¿Le explicó su proveedor de cuidado de maternidad que había posibilidades de elegir cómo dar a luz después de una cesárea pasada?

- 1 Yes / Sí
- 2 No / No

**BASE: TALKED WITH PROVIDER ABOUT SCHEDULING REPEAT CESAREAN BECAUSE OF PAST CESAREAN(S) (Q1215 = 1)**

**Q1235** Did your maternity care provider tell you his/her opinion about whether you should schedule another c-section? / ¿Le dijo su proveedor de cuidado de maternidad su opinión sobre si usted debe programar otra cesárea?

- 1 Yes, my provider thought **I should** schedule another c-section / Sí, mi proveedor pensó que **yo debía** programar otra cesárea
- 2 Yes, my provider thought **I should not** schedule another c-section / Sí, mi proveedor pensó que **yo no debía** programar otra cesárea
- 3 No, my provider did not give an opinion / No, mi proveedor no me dio una opinión

**BASE: TALKED WITH PROVIDER ABOUT SCHEDULING REPEAT CESAREAN BECAUSE OF PAST CESAREAN(S) (Q1215 = 1)**

**Q1240** Did your maternity care provider ask whether **you** wanted to schedule a c-section? / ¿Le preguntó su proveedor de cuidado de maternidad si **usted** quería programar una cesárea?

- 1 Yes / Sí
- 2 No / No

**BASE: TALKED WITH PROVIDER ABOUT SCHEDULING REPEAT CESAREAN BECAUSE OF PAST CESAREAN(S) (Q1215 = 1)**

**Q1245** Who made the final decision about scheduling another c-section? / ¿Quién hizo la decisión final sobre programar otra cesárea?

- 1 I feel it was mainly my decision / Siento que fue mayormente mi decisión
- 2 I feel it was mainly my provider's decision / Siento que fue mayormente la decisión de mi proveedor
- 3 I feel we made the decision together / Siento que hicimos juntos la decisión

**BASE: MOST RECENT BIRTH CESAREAN (Q1115 = 2)**

**Q1250** You told us that your recent birth on [date] was a c-section. Was the c-section planned ahead of time, that is, was the decision to have a c-section made before you went into labor? / Usted nos dijo que su reciente parto en el [date] fue por cesárea. ¿Fue la cesárea planeada con anticipación, es decir, la decisión de tener la cesárea fue hecha antes de que usted fuera a su labor de parto?

- 1 Yes, it was planned before I went into labor / Sí, fue planeada antes de que yo fuera a mi labor de parto
- 2 No, the decision was made after my labor started / No, la decisión fue hecha después de empezar mi labor de parto

**BASE: PRIMARY CESAREAN; MOST RECENT BIRTH CESAREAN AND HAD NO CESAREAN IN THE PAST (Q1115 = 2 AND NO CESAREAN IN Q1210a-o)**

**Q1255** What was the main reason for your recent c-section? **Choose the reason that best applies.** / ¿Cuál fue la razón principal para su reciente cesárea? **Escoja la razón más aplicable.**

- 1 I or my baby had a health problem that required a c-section / Yo o mi bebé teníamos un problema de salud que requería una cesárea
- 2 My maternity care provider was worried that the baby was too big / Mi proveedor de cuidado de maternidad estaba preocupado de que el bebé era muy grande
- 3 My maternity care provider tried to start (induce) my labor, but it didn't work / Mi proveedor de cuidado de maternidad trató de empezar (inducir) mi parto, pero no dio resultados
- 4 For a non-medical reason – it did not offer a health benefit to me or my baby / Por una razón no médica – no ofreció un beneficio de salud para mí o mi bebé
- 5 Some other reason. Please tell us: / Alguna otra razón. Por favor díganos:  
*Write-in = Q1255\_TEXT*

**BASE: REPEAT CESAREAN: MOST RECENT BIRTH CESAREAN AND HAD CESAREAN(S) IN THE PAST (Q1115 = 2 AND ANY Q1210a-o = 2)**

**Q1260** What was the main reason for your recent c-section? **Choose the reason that best applies.** / ¿Cuál fue la razón principal para su reciente cesárea? **Escoja la razón más aplicable.**

- 1 I had a c-section in a birth before this one. / Tuve una cesárea en un parto anterior a éste.
- 2 I or my baby had a health problem that required a c-section this time / Yo o mi bebé teníamos un problema de salud que requería una cesárea esta vez.
- 3 Both of these: I had a c-section in an earlier birth and a health problem this time / Ambas: tuve una cesárea en un parto anterior y problemas de salud esta vez
- 4 For a non-medical reason – it did not offer a health benefit to me or my baby / Por una razón no médica – no ofreció un beneficio de salud para mí o mi bebé
- 5 Some other reason. Please tell us: / Alguna otra razón. Por favor díganos:  
*Write-in = Q1260\_TEXT*

**BASE: REPEAT CESAREAN: MOST RECENT BIRTH CESAREAN AND HAD CESAREAN(S) IN THE PAST (Q1115c = 2 AND ANY Q1210a-o = 2)**

**Q1265** For your recent birth, were you interested in trying to have a vaginal birth after c-section (sometimes known as VBAC)? / Para su parto reciente, ¿estaba usted interesada en tratar de tener un parto vaginal después de una cesárea (algunas veces conocido como VBAC)?

- 1 Yes / Sí
- 2 No / No

**BASE: REPEAT CESAREAN: MOST RECENT BIRTH CESAREAN AND HAD CESAREAN(S) IN THE PAST (Q1115c = 2 AND ANY Q1210a-o = 2)**

**Q1270** In your recent birth, did you have the option of planning a vaginal birth after having had a previous c-section (VBAC)? / En su parto reciente, ¿tuvo usted la opción de planear un parto vaginal después de haber tenido una cesárea previa (VBAC)?

- 1 Yes / Sí
- 2 No / No
- 3 Not sure / No estoy segura

**BASE: DID NOT HAVE OPTION OF VBAC (Q1270 = 2)**

Why didn't you have the option of planning a vaginal birth after c-section (VBAC)? **Choose all that apply.** / ¿Por qué no tuvo usted la opción de planear un parto vaginal después de una cesárea (VBAC)? **Escoja todas las respuestas aplicables.**

**Q1275a** My maternity care provider did not allow VBAC / Mi proveedor de cuidado de maternidad no permitió VBAC

**Q1275b** My hospital did not allow VBAC / Mi hospital no permitió VBAC

**Q1275c** I needed a c-section for a health problem / Necesité una cesárea por un problema de salud

*For each:*

- 1 *Checked this box*
- 2 *Did not check this box*

**SECTION 1300: EXPERIENCES AND VIEWS OF GIVING BIRTH**

**BASE: ALL RESPONDENTS**

**Q1305** *We would like to learn more about your views and experiences of giving birth.* How much do you agree or disagree with the following statement? Childbirth is a process that should not be interfered with unless medically necessary. Do you...? / *Nos gustaría saber más sobre sus puntos de vista y experiencias de dar a luz.* ¿En qué medida está de acuerdo o en desacuerdo con la siguiente afirmación? El nacimiento es un proceso que no debe ser interferido a menos que sea médicamente necesario. ¿Está usted...?

- 1 Agree strongly / Totalmente de acuerdo
- 2 Agree somewhat / De acuerdo en cierto modo
- 3 Neither agree nor disagree / Ni de acuerdo ni en desacuerdo
- 4 Disagree somewhat / En desacuerdo en cierto modo
- 5 Disagree strongly / Totalmente en desacuerdo

**BASE: ALL RESPONDENTS**

**Q1310a** Did you feel pressure from any health professional to induce labor (use medicine or some other method to start your labor)? / ¿Se sintió presionada por cualquier profesional de la salud para inducir el parto (usar medicinas o algún otro método para empezar el parto)?

- 1 Yes / Sí
- 2 No / No

**BASE: ALL RESPONDENTS**

**Q1310b** Did you feel pressure from any health professional to use epidural for pain relief? / ¿Se sintió presionada por cualquier profesional de la salud para usar anestesia epidural para aliviar el dolor?

- 1 Yes / Sí
- 2 No / No

**BASE: ALL RESPONDENTS**

**Q1310c** Did you feel pressure from any health professional to have a c-section? / ¿Se sintió presionada por cualquier profesional de la salud para tener una cesárea?

- 1 Yes / Sí
- 2 No / No

**BASE: ALL RESPONDENTS**

**Q1310d** Did you feel pressure from any health professional to breastfeed? / ¿Se sintió presionada por cualquier profesional de la salud para dar pecho?

- 1 Yes / Sí
- 2 No / No

**BASE: ALL RESPONDENTS**

**Q1315a** During your recent hospital stay when you had your baby, how often were you treated unfairly because of your race or ethnicity? / Durante su reciente estadía en el hospital cuando usted tuvo a su bebé, ¿con qué frecuencia fue tratada injustamente a causa de u raza o grupo étnico?

- 1 Never / Nunca
- 2 Sometimes / Algunas veces
- 3 Usually / Usualmente
- 4 Always / Siempre

**BASE: ALL RESPONDENTS**

**Q1315b** During your recent hospital stay when you had your baby, how often were you treated unfairly because of the language you spoke? / Durante su reciente estadía en el hospital cuando usted tuvo a su bebé, ¿con qué frecuencia fue tratada injustamente a causa de el idioma que habló?

- 1 Never / Nunca
- 2 Sometimes / Algunas veces
- 3 Usually / Usualmente
- 4 Always / Siempre

**BASE: ALL RESPONDENTS**

**Q1315c** During your recent hospital stay when you had your baby, how often were you treated unfairly because of the type of health insurance you had or because you didn't have health insurance? / Durante su reciente estadía en el hospital cuando usted tuvo a su bebé, ¿con qué frecuencia fue tratada injustamente a causa de el tipo de seguro médico que tenía o porque usted no tenía seguro medico?

- 1 Never / Nunca
- 2 Sometimes / Algunas veces
- 3 Usually / Usualmente
- 4 Always / Siempre

**BASE: ALL RESPONDENTS**

**Q1320a** During your recent hospital stay when you had your baby, did a nurse or maternity care provider ever use harsh, rude or threatening language? / Durante su reciente estadía en el hospital cuando tuvo a su bebé, ¿Una enfermera o un proveedor de cuidado de maternidad alguna vez usó un lenguaje duro, grosero o amenazante?

- 1 Yes / Sí
- 2 No / No

**BASE: ALL RESPONDENTS**

**Q1320b** During your recent hospital stay when you had your baby, did a nurse or maternity care provider ever handle you roughly? / Durante su reciente estadía en el hospital cuando tuvo a su bebé, ¿Una enfermera o un proveedor de cuidado de maternidad alguna vez la agarró toscamente?

- 1 Yes / Sí
- 2 No / No

**BASE: EXPERIENCED LABOR (Q1115c = 1 OR Q1120 = 1)**

How much do you agree with the following statements about your recent experience of labor and birth? / ¿En qué medida está de acuerdo con las siguientes afirmaciones sobre su reciente experiencia de parto y alumbramiento?

**Q1325a** The delivery room staff encouraged me to make decisions about how I wanted my birth to progress. / El personal de la sala de partos me animó a hacer decisiones sobre cómo quería yo que progrese mi parto

**Q1325b** I felt well supported by staff during my labor and birth. / Me sentí muy apoyada por el personal durante el parto y el nacimiento.

**Q1325c** The staff communicated well with me during labor. / El personal se comunicó bien conmigo durante el parto.

*For each:*

- 1 Agree strongly / Totalmente de acuerdo
- 2 Agree somewhat / De acuerdo en cierto modo
- 3 Neither agree nor disagree / Ni de acuerdo ni en desacuerdo
- 4 Disagree somewhat / En desacuerdo en cierto modo
- 5 Disagree strongly / Totalmente en desacuerdo

**SECTION 1400: POSTPARTUM**

**BASE: ALL RESPONDENTS**

**Q1405** *We would also like to know about your experiences since your recent birth.*

Between the time you left the hospital after birth and 8 weeks after the birth, how many **office visits** did you have with a **maternity care provider for yourself**? If you are not sure, give your best guess. If none, please enter "0." / Entre el tiempo en que usted salió del hospital después del parto y 8 semanas después del parto, ¿cuántas **visitas a la oficina** hizo usted **al proveedor de cuidado de maternidad para usted misma**? Si no está segura, dé su mejor estimado. Si no hizo ninguna, entre "0".

[RANGE: 0-20]

\_\_|\_\_| office visits / visitas a la oficina

**BASE: DID NOT HAVE ANY POSTPARTUM OFFICE VISITS (Q1405 = 0)**

**Q1410** What is the **main** reason why you **didn't** have visits or check-ups with your maternity provider in the first 8 weeks after the birth? / ¿Cuál es la **principal razón** por la que usted **no hizo** visitas o chequeos con su proveedor de cuidado de maternidad, en las primeras 8 semanas después del parto?

- 1 I didn't need more care / No necesité más cuidado
- 2 I didn't have insurance for the visit / No tenía seguro para la visita
- 3 I didn't have a way to get to the visit / No tenía manera de ir a la visita
- 4 I didn't feel well/was tired, and didn't want to go out / No me sentía bien/estaba cansada y no quería salir
- 5 I had other things to do and didn't have time / Tenía otras cosas que hacer y no tenía tiempo
- 6 Other, please tell us: / Otra, por favor díganos:  
*Write-in = Q1410\_TEXT*

**BASE: HAD POSTPARTUM OFFICE VISIT (Q1405 = 1 OR MORE) AND WAS BREASTFEEDING AT 1 WEEK (Q1186 = 1 OR 3)**

**Q1415a** During your postpartum office [visit/visits] in the **first 8** weeks after birth, did any maternity care provider ask if you needed help with breastfeeding? / Durante su(s) [visita/visitas] de postparto a la oficina, en las **primeras 8** semanas después del parto, ¿le preguntó algún proveedor de cuidado de maternidad si usted necesitaba ayuda con la lactancia materna?

- 1 Yes / Sí
- 2 No / No

**BASE: HAD POSTPARTUM OFFICE VISIT (Q1405 = 1 OR MORE)**

**Q1415b** During your postpartum office [visit/visits] in the **first 8** weeks after birth, did any maternity care provider ask if you needed help with a method of birth control? / Durante su(s) [visita/visitas] de postparto a la oficina, en las **primeras 8** semanas después del parto, ¿le preguntó algún proveedor de cuidado de maternidad si usted necesitaba ayuda con un método anticonceptivo?

- 1 Yes / Sí
- 2 No / No

**BASE: HAD POSTPARTUM OFFICE VISIT (Q1405 = 1 OR MORE)**

**Q1415c** During your postpartum office [visit/visits] in the **first 8** weeks after birth, did any maternity care provider ask if you were feeling depressed? / Durante su(s) [visita/visitas] de postparto a la oficina, en las **primeras 8** semanas después del parto, ¿le preguntó algún proveedor de cuidado de maternidad si usted se estaba sintiendo deprimida?

- 1 Yes / Sí
- 2 No / No

**BASE: ALL RESPONDENTS**

**Q1450a** Over the **past 2 weeks**, how often have you been bothered by feeling nervous, anxious, or on edge? / En las **pasadas 2 semanas**, ¿qué tan seguido ha sido fastidiada por sentirse nerviosa, ansiosa o tensa?

- 1 Never / Nunca
- 2 Sometimes / Algunas veces
- 3 Usually / Usualmente
- 4 Always / Siempre

**BASE: ALL RESPONDENTS**

**Q1450b** Over the **past 2 weeks**, how often have you been bothered by not being able to stop or control worrying? / En las **pasadas 2 semanas**, ¿qué tan seguido ha sido fastidiada por no poder parar o controlar su preocupación?

- 1 Never / Nunca
- 2 Sometimes / Algunas veces
- 3 Usually / Usualmente
- 4 Always / Siempre

**BASE: ALL RESPONDENTS**

**Q1450c** Over the **past 2 weeks**, how often have you been bothered by feeling down, depressed, or hopeless? / En las **pasadas 2 semanas**, ¿qué tan seguido ha sido fastidiada por sentirse decaída, deprimida o desesperanzada?

- 1 Never / Nunca
- 2 Sometimes / Algunas veces
- 3 Usually / Usualmente
- 4 Always / Siempre

**BASE: ALL RESPONDENTS**

**Q1450d** Over the **past 2 weeks**, how often have you been bothered by having little interest or pleasure in doing things? / En las **pasadas 2 semanas**, ¿qué tan seguido ha sido fastidiada por tener poco interés o placer en hacer cosas?

- 1 Never / Nunca
- 2 Sometimes / Algunas veces
- 3 Usually / Usualmente
- 4 Always / Siempre

**BASE: ALL RESPONDENTS**

**Q1460a** Did you receive any counseling or treatment for emotional or mental well-being during your recent pregnancy? / ¿Recibió usted alguna consejería o tratamiento para su bienestar emocional o mental durante su reciente embarazo?

- 1 Yes / Sí
- 2 No / No

**BASE: ALL RESPONDENTS**

**Q1460b** Did you receive any counseling or treatment for emotional or mental well-being since your recent birth? / ¿Recibió usted alguna consejería o tratamiento para su bienestar emocional o mental desde su reciente parto?

- 1 Yes / Sí
- 2 No / No

**BASE: ALL RESPONDENTS**

**Q1465** Are you **now** taking any medicine for anxiety or depression? / ¿Está tomando **ahora** alguna medicina para la ansiedad o la depresión?

- 1 Yes / Sí
- 2 No / No
- 3 Not sure / No estoy segura



**BASE: TAKING ANXIETY OR DEPRESSION MEDS AT PRESENT (Q1465 = 1)**

**Q1470** Is this medicine for ...? / ¿Es esta medicina para ...?

- 1 Anxiety / Ansiedad
- 2 Depression / Depresión
- 3 Both anxiety and depression / Ambas, ansiedad y depresión
- 4 Not sure / No estoy segura

**BASE: ALL RESPONDENTS**

**Q1480a** Since the birth of your baby, how often do you have someone you can turn to for emotional support, such as listening to your concerns and giving good advice? / Desde el nacimiento de su bebé, ¿qué tan seguido tiene usted alguien a quién acudir para apoyo emocional, tal como escuchar sus preocupaciones y dar un buen consejo?

- 1 Never / Nunca
- 2 Sometimes / Algunas veces
- 3 Usually / Usualmente
- 4 Always / Siempre

**BASE: ALL RESPONDENTS**

**Q1480b** Since the birth of your baby, how often do you have someone you can turn to for practical support, such as helping you get things done or get information you need? Desde el nacimiento de su bebé, ¿qué tan seguido tiene usted alguien a quién acudir para apoyo práctico, tal como ayudarle a hacer las cosas o conseguir información que usted necesita?

- 1 Never / Nunca
- 2 Sometimes / Algunas veces
- 3 Usually / Usualmente
- 4 Always / Siempre

**SECTION 1500: BREASTFEEDING**

**BASE: ALL RESPONDENTS**

**Q1510a** Are you now feeding your baby breast milk? / ¿Está alimentando ahora a su bebé con leche materna?

- 1 Yes / Sí
- 2 No / No

**BASE: ALL RESPONDENTS**

**Q1510b** Are you now feeding your baby formula? / ¿Está alimentando ahora a su bebé con fórmula?

- 1 Yes / Sí
- 2 No / No

**BASE: ALL RESPONDENTS**

**Q1510c** Are you now feeding your baby solid food? / ¿Está alimentando ahora a su bebé con comida sólida?

- 1 Yes / Sí
- 2 No / No

**BASE: EXCLUSIVELY BREASTFEEDING A WEEK AFTER BIRTH AND IS CURRENTLY NOT EXCLUSIVELY BREASTFEEDING (Q1186 = 1 AND (Q1510b = 1 OR Q1510c = 1))**

About how long did you feed your baby with breast milk **only** (and no formula or other food)? **Please answer in months OR in weeks.** / ¿Como cuánto tiempo alimentó a su bebé **solamente** con leche materna (y no fórmula u otra comida)? **Por favor conteste en semanas O en meses.**

**Q1515a**

[RANGE: 1-11]

\_\_\_\_| months / meses

**Q1515b**

[RANGE: 1-48]

\_\_\_\_| weeks / semanas

**OR / O**

**BASE: ANY BREASTFEEDING AT ONE WEEK AND NOT CURRENTLY FEEDING BREAST MILK ((Q1186 = 1 OR 3) AND (Q1510a = 2))**

About how old was your baby when you stopped feeding any breast milk - that is, when your baby was completely weaned? **Please answer in months OR in weeks.** / ¿Aproximadamente qué edad tenía su bebé cuando usted dejó de darle cualquier leche materna –es decir, cuando su bebé fue completamente destetado? **Por favor conteste en semanas O en meses.**

**Q1520a**

[RANGE: 1-12]

\_\_\_\_| months / meses

**Q1520b**

[RANGE: 1-52]

\_\_\_\_| weeks / semanas

**OR / O**

**BASE: ANY BREASTFEEDING AT ONE WEEK AND NOT CURRENTLY FEEDING BREAST MILK ((Q1186 = 1 OR 3) AND (Q1510a = 2))**

**Q1525** Did you breastfeed for as long as you wanted to? / ¿Le dio pecho por tanto tiempo como usted quiso?

- 1 Yes / Sí
- 2 No / No

**SECTION 1600: EMPLOYMENT**

**BASE: ALL RESPONDENTS**

**Q1615** Are you working for pay now (including self-employment)? / ¿Tiene un trabajo pagado ahora (incluyendo trabajo por su propia cuenta)?

- 1 Yes, full time / Sí, a tiempo completo
- 2 Yes, part time / Sí, a tiempo parcial
- 3 No, but I plan to work at a paid job in the next few months / No, pero planeo trabajar en un empleo pagado en unos cuantos meses
- 4 No, and I plan to stay home with my baby / No, y planeo quedarme en casa con mi bebé

**BASE: NOW DOING A PAID JOB (Q1615 = 1 OR 2)**

How old was your new baby when you went back to work or began working for pay? If you are not sure, give your best guess. **Please answer in months OR in weeks.** / ¿Qué edad tenía su nuevo bebé cuando usted volvió a trabajar o empezó a trabajar en un empleo pagado? Si no está segura, dé su mejor estimado. **Por favor conteste en semanas O en meses.**

**Q1620a**

[RANGE: 0-12]

\_\_\_\_| months / meses

**Q1620b**

[RANGE: 0-52]

\_\_\_\_| weeks / semanas

**OR / O**

**BASE: PLANS TO RETURN TO PAID JOB (Q1615 = 3)**

How old will your new baby be when you go back to work or start working for pay? If you are not sure, give your best guess. **Please answer in months OR in weeks.** / ¿Qué edad tendrá su nuevo bebé cuando usted vuelva a trabajar o empiece a trabajar en un empleo pagado? Si no está segura, dé su mejor estimado. **Por favor conteste en semanas O en meses.**

**Q1625a**

[RANGE: 0-24]

\_\_\_\_| months / meses

**Q1625b**

[RANGE: 0-104]

\_\_\_\_| weeks/semanas

**OR / O**

**BASE: NOW DOING A PAID JOB (Q1615 = 1 or 2)**

**Q1630** Were you able to be home with your baby for as long as you wanted before you began working for pay? / ¿Pudo usted estar en casa con su bebé por tanto tiempo como usted quiso, antes de empezar a trabajar en un empleo pagado?

- 1 Yes / Sí
- 2 No / No
- 3 Not sure / No estoy segura

**SECTION 1700: WOMEN'S ATTITUDES, BELIEFS, PREFERENCES**

**BASE: ALL RESPONDENTS**

**Q1705a** *We would like to know more about your views of maternity care.* Do you think the **quality** of maternity care is generally the same for all obstetricians in your area? / *Nos gustaría saber más sobre sus puntos de vista del cuidado de maternidad.* ¿Piensa usted que la **calidad** del cuidado de maternidad es generalmente igual entre todos los obstetras en su área?

- 1 Yes, it's pretty much the same / Sí, es más o menos igual
- 2 No, there can be big differences / No, pueden haber diferencias grandes
- 3 Not sure / No estoy segura

**BASE: ALL RESPONDENTS**

**Q1705b** Do you think the **quality** of maternity care is generally the same for all hospital maternity services in your area? / ¿Piensa usted que la **calidad** del cuidado de maternidad es generalmente igual entre todos los hospitales con servicios de maternidad en su área?

- 1 Yes, it's pretty much the same / Sí, es más o menos igual
- 2 No, there can be big differences / No, pueden haber diferencias grandes
- 3 Not sure / No estoy segura

**BASE: ALL RESPONDENTS**

**Q1710a** If you have a future pregnancy, how open would you be to having a midwife as your maternity care provider (with doctor care, if needed)? / Si usted tiene un futuro embarazo, ¿qué tan abierta estaría a tener una partera como proveedora de cuidado de maternidad (con cuidado de un doctor, si es necesario)?

- 1 Would definitely **not want** this / Definitivamente **no querría** esto
- 2 Would **consider** this / **Consideraría** esto
- 3 Would definitely **want** this / Definitivamente **querría** esto
- 4 Not sure / No estoy segura

**BASE: ALL RESPONDENTS**

**Q1710b** If you have a future pregnancy, how open would you be to giving birth in a birth center that is separate from a hospital (with hospital care, if needed)? / Si usted tiene un futuro embarazo, ¿qué tan abierta estaría a dar a luz en un centro de partos que esté separado del hospital (con cuidado del hospital, si es necesario)?

- 1 Would definitely **not want** this / Definitivamente **no querría** esto
- 2 Would **consider** this / **Consideraría** esto
- 3 Would definitely **want** this / Definitivamente **querría** esto
- 4 Not sure / No estoy segura

**BASE: ALL RESPONDENTS**

**Q1710c** If you have a future pregnancy, how open would you be to giving birth at home (with hospital care, if needed)? / Si usted tiene un futuro embarazo, ¿qué tan abierta estaría a dar a luz en casa (con cuidado del hospital, si es necesario)?

- 1 Would definitely **not want** this / Definitivamente **no querría** esto
- 2 Would **consider** this / **Consideraría** esto
- 3 Would definitely **want** this / Definitivamente **querría** esto
- 4 Not sure / No estoy segura

**BASE: ALL RESPONDENTS**

**Q1710d** If you have a future pregnancy, how open would you be to having the support of a doula (trained labor companion) while you are giving birth? / Si usted tiene un futuro embarazo, ¿qué tan abierta estaría a tener el apoyo de una doula (compañera de parto entrenada) mientras usted está dando a luz?

- 1 Would definitely **not want** this / Definitivamente **no querría** esto
- 2 Would **consider** this / **Consideraría** esto
- 3 Would definitely **want** this / Definitivamente **querría** esto
- 4 Not sure / No estoy segura

**BASE: DEFINITELY WOULD NOT WANT TO HAVE A MIDWIFE AS A MATERNITY CARE**

**PROVIDER (Q1710a = 1)**

Why would you **definitely not want** a midwife to be your maternity care provider? **Please choose all that apply.** / ¿Por qué usted **definitivamente no querría que** una partera sea su proveedora de cuidado de maternidad? **Por favor escoja todas las respuestas aplicables.**

**Q1715a** I think a doctor provides higher quality care / Pienso que un doctor provee cuidado de mejor calidad

**Q1715b** I think a doctor handles emergencies better / Pienso que un doctor maneja mejor las emergencias

**Q1715c** I have health problems that are best handled by a doctor / Tengo problemas de salud que son manejados mejor por un doctor

**Q1715d** I know about doctors and don't know much about midwives / Sé sobre los doctores y no sé mucho sobre las parteras

**Q1715e** I thought that midwives did not give care in hospitals / Pensaba que las parteras no dan cuidados en los hospitales

**Q1715f** I already have a maternity care provider (not a midwife) who I like / Ya tengo un proveedor de cuidados de la maternidad (no una partera) que me gusta

**Q1715g** Other. Please tell us: / Otro. Por favor díganos:

*Write-in = Q1715\_TEXT*

*For each:*

- 1 *Checked this box*
- 2 *Did not check this box*

**SECTION 1800: BIOMETRICS, INSURANCE AND DEMOGRAPHICS**

**BASE: ALL RESPONDENTS**

*The next questions ask about you and your background. They will help us understand the variety of women who participate in our survey. / Las siguientes preguntas son sobre usted y su historial. Ellas nos van a ayudar a entender a la diversidad de mujeres que participan en nuestra encuesta.*

What is your height? **Please answer in feet and inches OR in centimeters.** / ¿Cuál es su estatura? **Por favor conteste en pies y pulgadas O en centímetros.**

**Q1805a**

[RANGE: 4 – 7]

\_|\_| feet / pies

**Q1805b**

[RANGE: 0 – 11]

\_|\_| inches / pulgadas

**Q1805c**

[RANGE: 122 – 200]

\_|\_|\_| centimeters / centímetros

**OR/O**

**BASE: ALL RESPONDENTS**

*NOTE. Due to an error, the question on weight was asked differently in the English and the Spanish surveys. This question has been separated into two variables based on the language in which the respondent chose to take the survey. Respondents could answer in pounds or in kilos. Responses have been converted into pounds if response was in kilos.*

**Q1810E.** English survey: What did you weigh just before you gave birth? If you are not sure, give your best guess.

**Q1810S.** Spanish survey [translated]: What did you weigh just before you got pregnant? If you are not sure, give your best guess. **Please answer in pounds OR in kilos.** / ¿Cuánto pesaba justo antes de quedar embarazada? Si no está segura, dé su mejor estimado. **Por favor conteste en libras O en kilos.**

**Q1810a**

[RANGE: 75 – 400]

\_|\_|\_| pounds / libras

**Q1810b**

[RANGE: 34-227]

\_|\_|\_| kilos / kilos

**OR / O**

**BASE: ALL RESPONDENTS**

How much weight did you **gain** during your pregnancy? If you are not sure, give your best guess. Use 0 if you lost weight or gained no weight. **Please answer in pounds OR in kilos.** / ¿Cuánto peso **subió** durante su embarazo? Si no está segura dé su mejor estimado. Use 0 si bajó de peso o no subió de peso. **Por favor conteste en libras O en kilos.**

**Q1811a**

[RANGE: 0-150]

\_|\_|\_| pounds / libras

**Q1811b**

[RANGE: 0-70]

\_|\_|\_| kilos / kilos

**OR / O**

**BASE: ALL RESPONDENTS**

What is your **current** weight? If you are not sure, give your best guess. **Please answer in pounds OR in kilos.** / ¿Cuál es su peso **actual**? Si no está segura dé su mejor estimado. **Por favor conteste en libras O en kilos.**

**Q1815a**

[RANGE: 75 – 450]

\_|\_|\_| pounds / libras

**Q1815b**

[RANGE: 34 – 205]

\_|\_|\_| kilos / kilos

**OR / O**

**BASE: ALL RESPONDENTS**

**Q1820** At the time you gave birth, were you...? / Cuando usted dio a luz, ¿estaba usted...?

- 1 Married / Casada
- 2 Living with someone as if married / Viviendo con alguien como casados
- 3 Separated, divorced or widowed / Separada, divorciada o viuda
- 4 Single, never married / Soltera, nunca me casé

**BASE: ALL RESPONDENTS**

At the time of your recent birth, what insurance did you have to pay for your maternity care (including provider and hospital bills)? **Select all that apply.** / Cuando tuvo su reciente parto, ¿Que tipo de seguro tenía usted para pagar por su cuidado de maternidad (incluyendo las cuentas del proveedor y del hospital)? **Seleccione todo lo que sea aplicable.**

**Q1825a** Medi-Cal / Medi-Cal

**Q1825b** A health plan paid for by Medi-Cal / Un plan de salud pagado por Medi-Cal

**Q1825c** Private insurance through your job or the job of your spouse, partner or parent / Seguro privado de su trabajo o el trabajo de su esposo, compañero o padre

**Q1825d** Private insurance bought from a health insurance company or plan, or through *Covered California* / Seguro privado comprado de una compañía de seguros o plan de salud, o a través de *Covered California*

**Q1825e** Other [Name of plan:] / Otro [Nombre del plan:]

*Write-in = Q1825\_TEXT*

**Q1825f** I did not have Medi-Cal or any other health insurance to pay for my maternity care / No tuve Medi-Cal o ningún otro seguro de salud para pagar por mi cuidado de maternidad (*Exclusive*)

**Q1825g** Not sure / No estoy segura

*For each:*

- 1 *Checked this box*
- 2 *Did not check this box*

**BASE: ALL RESPONDENTS**

**Q1830** Thinking of your recent pregnancy and birth, what are the total costs you have been asked to pay yourself **for any of your maternity care providers and hospital bills for you and your baby**? Please include bills already paid and bills owed. Please do not include the cost of buying your health insurance. If you are not sure, give your best guess. **Please answer in numbers without using any commas.** / Pensando en su reciente embarazo y parto, ¿cuáles son los costos totales que le han pedido a usted que pague usted misma, **por las cuentas de cualquiera de sus proveedores de cuidado de maternidad y hospitales, por usted y su bebé**? Por favor incluya las cuentas que ya pagó y cuentas que debe. Por favor no incluya el costo de la compra de su seguro de salud. Si usted no está segura, dé su mejor estimado. **Por favor conteste en números sin usar ninguna coma.**

[RANGE: 0– 250,000]

\$ | |\_| |\_| |\_| |\_| |\_| |\_|

**BASE: ALL RESPONDENTS**

**Q1835** In what country were you born?

- 1 United States / Estados Unidos
- 2 Some other country but born as United States citizen (like a military or diplomatic family) / Algún otro país pero nacido como ciudadano de los Estados Unidos (como una familia militar o diplomática)
- 3 Some other country / Algún otro país

**BASE: BORN OUTSIDE US OR NOT SURE OR DECLINE TO ANSWER (Q1835 = 2 OR 3)**

**Q1840** In what year did you first start living in the United States? / In what year did you first start living in the United States? / ¿En qué año empezó usted a vivir en los Estados Unidos?

[RANGE: 1960 – 2016]

\_\_\_\_

**BASE: ALL RESPONDENTS**

**Q1842** How old were you when your recent baby was born? / ¿Qué edad tenía cuando nació su bebé reciente?

[RANGE: 18-60]

\_\_\_\_ years / años

**BASE: ALL RESPONDENTS**

**Q1845** What language do you usually speak at home? / ¿Qué idioma habla usualmente usted en casa?

- 1 English / Inglés
- 2 Spanish / Español
- 3 English and Spanish equally / Inglés y español igualmente
- 4 Asian language. Please tell us: / Idioma asiático. Por favor díganos cuál:  
*Write-in = Q1845d\_TEXT*
- 5 Some other language. Please tell us: / Algún otro idioma. Por favor díganos cuál:  
*Write-in = Q1845e\_TEXT*

**BASE: ALL RESPONDENTS**

**Q1850** Are you of Hispanic, Latina or Spanish descent?

- 1 Yes, Hispanic or Latina / Sí, hispana o latina
- 2 No, not Hispanic or Latina / No, no hispana o latina

**BASE: ALL RESPONDENTS**

Which of the following best describes how you identify yourself? **Please select all that apply.** / ¿Cuál de lo siguiente describe mejor cómo se identifica usted a sí misma? **Por favor seleccione todo lo aplicable.**

**Q1855a** White / Blanco

**Q1855b** Black or African American / Negra o afro americana

**Q1855c** Asian / Asiática

**Q1855d** American Indian or Alaskan Native / India americana o nativa de Alaska

**Q1855e** Native Hawaiian or other Pacific Islander / Nativa Hawaiana u otra isla del Pacífico

**Q1855f** Something else. Please tell us: / Alguna otra. Por favor díganos:

*Write-in = Q1855\_TEXT*

*For each:*

- 1 *Checked this box*
- 2 *Did not check this box*

**BASE: ALL RESPONDENTS**

**Q1860** What is the highest level of education you have completed or the highest degree you have received? / ¿Cuál es el nivel más alto de educación que usted ha completado o el grado más alto que ha recibido?

- 1 Less than high school / Menos de escuela secundaria
- 2 Some high school / Algo de escuela secundaria
- 3 High school diploma or GED / Diploma de la escuela secundaria o examen GED
- 4 Some college, but no degree / Algo en la universidad pero no diploma
- 5 Associate's degree / Grado de asociado
- 6 College (such as B.A., B.S.) / Universidad (tal como Bachiller en Artes o Ciencias)
- 7 Some graduate school, but no degree / Algún estudio graduado pero no diploma
- 8 Graduate school (such as M.S., M.D., Ph.D.) / Escuela de Graduados (tal como Máster en Ciencias, Doctor en Medicina, PhD)

**BASE: ALL RESPONDENTS**

**Q1865** Which of the following income categories best describes your total 2016 **household** income before taxes? If you do not know, please give your best guess. / ¿Cuál de las siguientes categorías de ingreso describe mejor su ingreso **familiar** total antes de impuestos, en el 2016? Si no está segura dé su mejor estimado

- |    |                            |    |                           |
|----|----------------------------|----|---------------------------|
| 01 | \$16,000 or less / o menos | 11 | \$60,001-\$65,000         |
| 02 | \$16,001-\$20,000          | 12 | \$65,001-\$73,000         |
| 03 | \$20,001-\$24,000          | 13 | \$73,001-\$81,000         |
| 04 | \$24,001-\$28,000          | 14 | \$81,001-\$85,000         |
| 05 | \$28,001-\$32,000          | 15 | \$85,001-\$97,000         |
| 06 | \$32,001-\$37,000          | 16 | \$97,001-\$110,000        |
| 07 | \$37,001-\$40,000          | 17 | \$110,001-\$114,000       |
| 08 | \$40,001-\$48,000          | 18 | \$114,001-\$130,000       |
| 09 | \$48,001-\$57,000          | 19 | \$130,001-\$147,000       |
| 10 | \$57,001-\$60,000          | 20 | \$147,001 or more / o más |

**BASE: PROVIDED INCOME ESTIMATE (Q1865 = between 1 and 20)**

**Q1870** Including your new baby, how many people lived on this income? / Incluyendo a su nuevo bebé, ¿cuántas personas vivieron con este ingreso?

[RANGE 2-20]

\_\_\_ people / personas

**BASE: ALL RESPONDENTS**

**Q1875** We have three more questions. First, what was the **best thing about the care** you or your baby got while in the hospital for your recent birth? Please tell us. / Tenemos tres preguntas más. Primero, ¿cuál fue **la mejor cosa sobre el cuidado** que usted y su bebé tuvieron mientras estuvieron en el hospital, en su parto reciente? Por favor díganos.

**BASE: ALL RESPONDENTS**

**Q1880** Second, what was the **worst thing about the care** you or your baby got while in the hospital for your recent birth? Please tell us. / Segundo, ¿cuál fue **la peor cosa sobre el cuidado** que usted y su bebé tuvieron, mientras estuvieron en el hospital en su parto reciente? Por favor díganos.

**BASE: ALL RESPONDENTS**

**Q1885** If there is anything else you would like to tell us, please do so here. / Si hay algo más que usted quisiera decirnos, por favor hágalo aquí.
